# Supplementary material
Source: PubMed Central journal article supplement (PMC11113223)
Supplement: 18_2015_1908_MOESM18_ESM.pdf [file 18_2015_1908_MOESM18_ESM.pdf]

|                                                               | RNase T1                                                                                                                   | RNase V1                                                                                                                                                                                                                                                       | RNases T1 and V1    |
|---------------------------------------------------------------|----------------------------------------------------------------------------------------------------------------------------|----------------------------------------------------------------------------------------------------------------------------------------------------------------------------------------------------------------------------------------------------------------|---------------------|
| Single changes                                                | G <sub>216</sub> ↑ G <sub>219</sub> ↑ G <sub>220</sub> ↑<br>G <sub>399</sub> ↑ G <sub>405</sub> ↑ <b>G<sub>414</sub></b> ↑ | <b>G<sub>216</sub></b> ↓ C <sub>330</sub> ↑ A <sub>331</sub> ↑<br>C <sub>347</sub> ↑ <b>U<sub>343</sub></b> ↓                                                                                                                                                  |                     |
| Helix junction                                                | G <sub>212</sub> ↓↓↓<br>G <sub>332</sub> ↑↑<br>G <sub>363</sub> ↓↓↑↑                                                       | U <sub>343</sub> ↓↓                                                                                                                                                                                                                                            |                     |
| Pseudoknot                                                    | G <sub>373</sub> ↑<br>G <sub>339</sub> ↓↓ <sub>p</sub> G <sub>340</sub> ↓ <sup>a</sup><br><br>G <sub>224</sub> ↑↑↑         | U <sub>315</sub> ↑ C <sub>419</sub> ↓<br>G <sub>312</sub> ↓ <sub>p</sub> C <sub>313</sub> ↓↓↓<br>U <sub>319</sub> ↑↑ <sub>p</sub> U <sub>p</sub> C <sub>321</sub> ↑ <sup>a</sup><br>C <sub>318</sub> ↑↑↑<br>C <sub>226</sub> ↓ <sub>p</sub> A <sub>227</sub> ↓ |                     |
| not assigned to helix junction<br>or to pseudoknotted regions | G <sub>349</sub> ↓                                                                                                         |                                                                                                                                                                                                                                                                | G <sub>361</sub> ↓↑ |

**red:** U<sub>206</sub>CU<sub>208</sub>→AAA (D1), **yellow:** U<sub>328</sub>UC<sub>330</sub>→AAA (D2); **green:** G<sub>358</sub>AU<sub>360</sub> D3, **orange:** C<sub>370</sub>UA<sub>372</sub>→AAA (D4).

D1 to D4 are domains 1 to 4.

Bases marked with <sup>a</sup>, are nearest neighbours to bases commonly modified after different domains were mutated.
